# Supplementary material for: Differences between frequent emergency department users in a secondary rural hospital and a tertiary suburban hospital in central Japan: a prevalence study
Source: PubMed Central journal article supplement — BMJ Open. 2020 Sep 7;10(9):e039030. doi: 10.1136/bmjopen-2020-039030 (PMC7478017; doi:10.1136/bmjopen-2020-039030), 2020-09-07
Supplement: bmjopen-2020-039030supp001.pdf [file bmjopen-2020-039030supp001.pdf]

## Supplementary file

## Factors associated with frequent ED visits at the patient level (n = 20,388)

| <b>Factors</b>              | <b>Odds Ratio (95% CI)</b> | <b>P value</b> |
|-----------------------------|----------------------------|----------------|
| age                         | 1.01 (1.00-1.02)           | .004           |
| gender                      | 1.27 (.90-1.79)            | .179           |
| receiving Public Assistance | 7.19 (2.87-18.07)          | <0.001         |

ED: Emergency Department

## Factors associated with frequent ED visits at the visit level (n = 25,231)

| <b>Factors</b>               | <b>Odds Ratio (95% CI)</b> | <b>P value</b> |
|------------------------------|----------------------------|----------------|
| use of ambulance             | .81 (1.00-1.02)            | .011           |
| evaluating service in the ED |                            |                |
| Internal medicine            | 1.27 (1.02-1.57)           | .032           |
| Surgery                      | 0.74 (.49-1.11)            | .144           |
| Orthopaedics                 | 0.63 (.47-0.84)            | .002           |
| Psychiatry                   | 124.69 (85.89-181.01)      | <0.001         |
| Paediatrics                  | 1.12 (.85-1.47)            | .44            |
| Obstetrics/Gynecology        | 2.77 (2.09-3.67)           | <0.001         |

ED: Emergency Department
